# Supplementary material for: Improving the performance of the PLB index for ligand-binding site prediction using dihedral angles and the solvent-accessible surface area
Source: PubMed Central journal article supplement (PMC5020399; doi:10.1038/srep33232), 2016-09-13
Supplement: srep33232-s1.pdf [file srep33232-s1.pdf]

## **Supplementary Information**

Improving the performance of the PLB index for ligand-binding site prediction using dihedral angles and the solvent-accessible surface area

Chen Cao<sup>1,2\*</sup>, Shutan Xu<sup>3</sup>

<sup>1</sup>College of Computer Science and Technology, Jilin University, Changchun, Jilin, China

<sup>2</sup>Key Laboratory of Symbol Computation and Knowledge Engineering of the Ministry of Education, Jilin University, Changchun, Jilin, China

<sup>3</sup>Department of Biochemistry and Molecular Biology, Institute of Bioinformatics, University of Georgia, Athens, GA, USA

\*Corresponding author: Chen Cao (email: caochen13@mails.jlu.edu.cn)

Supplementary Tables S1-S7

```

import requests
import re
import time
import os

def getpdb(pdbid,chain):
    data={
        "pdbid":pdbid,
        "chain":chain,
        "email":",",
        "number":3,
    }
    session=requests.session()
    html=session.post('http://projects.biotec.tu-dresden.de/mpcgi/metapocket.cgi',data=data).text
    url=re.findall('URL=(http.*?.html)',html)[0]
    count=0
    while True:
        html=session.get(url,timeout=200).text
        urls=re.findall('href="(http.*?pdb)"',html.replace(' ',''))
        if urls==[]:
            time.sleep(1)
            if count==100:
                return False
            count+=1
            continue
        break
    for url in urls:
        try:
            content=requests.get(url,timeout=200).content
            with open('result/'+url.split('/')[-1], 'wb') as pdbfile:
                pdbfile.write(content)
        except:
            print(url,'--failed')
    return True

def main():
    try:
        os.mkdir('result')
    except:
        pass
    for line in open('list.txt','r'):
        line=line.replace("\n","")
        lists=line.split(' ')
        try:
            statue=getpdb(lists[0],lists[1])
        except:
            print(line,'--failed')
        if(stature==False):
            print(line,'--No result')
            continue
        print(line,'--ok')

main()

```

**Table S1. Python script for setting parameters and downloading prediction**

**results from the MPK2 web server automatically.** The Python script automatically

downloads the ligand-binding site prediction results from various methods (including

Surfnet, ConCavity, MPK2, and Q-SiteFinder) and the file of pocket grids for the protein calculated by Ligsite-cs.

```

import requests
import threading
import re
import os

class GetPdb(threading.Thread):
    def __init__(self,pdbid,chain):
        super(GetPdb,self).__init__()
        self.filename=pdbid+'-'+chain+'.pdb'
        self.data={
            "pdbid":pdbid,
            # "chain":' ',
            "rerank":'on',
            "space":1.0,
            "number":5,
            "radius":5.0,
            "submit":'Find pockets'
        }
    def run(self):
        html=requests.post('http://projects.biotec.tu-dresden.de/cgi-bin/pocketfinder.cgi',data=self.data).text
        try:
            url=re.findall('href="(.*?.pdb)"',html)[0]
        except:
            pass
        content=requests.get('http://projects.biotec.tu-dresden.de'+url).content
        with open('result/'+self.filename,'wb') as filew:
            filew.write(content)

def main():
    try:
        os.mkdir('result')
    except:
        pass
    for line in open('list.txt','r'):
        line=line.replace('\n','')
        lists=line.split(' ')
        try:
            work=GetPdb(lists[0],lists[1])
            work.run()
        except:
            print(line,'--failed')
        print(line,'--ok')

main()

```

**Table S2. Python script for setting parameters and downloading prediction**

**results from the Ligsite-csc web server automatically.** The Python script

automatically downloads the ligand-binding site prediction results obtained using

Ligsite-csc.

```

import requests
from bs4 import BeautifulSoup
import os
import time

def upload(filename):
    data={
        'SITE_NAME':'SITEHOUND',
        'pdb_id':"",
        'probe':'CMET',
        'algorithm':'a',
        'filename':filename,
    }
    session=requests.session()
    files={'file': open('pdb_dir/%s'%filename, 'rb')}
    html=session.post('http://scbx.mssm.edu/sitehound/sitehound-web/cgi/wait1.cgi',data=data,files=files).text
    inputs=BeautifulSoup(html,'html.parser').find_all('input')
    data={}
    for item in inputs:
        data[item.get('name')]=item.get('value')
    html=session.post('http://scbx.mssm.edu/sitehound/sitehound- web/cgi/protein_processing.cgi',data=data).text
    inputs=BeautifulSoup(html,'html.parser').find_all('input')
    data={}
    for item in inputs:
        data[item.get('name')]=item.get('value')
    html=session.post('http://scbx.mssm.edu/sitehound/sitehound-web/cgi/wait3.cgi',data=data).text
    inputs=BeautifulSoup(html,'html.parser').find_all('input')
    data={}
    for item in inputs:
        data[item.get('name')]=item.get('value')
    html=session.post('http://scbx.mssm.edu/sitehound/sitehound-web/cgi/sitehound.cgi',data=data).text
    url=BeautifulSoup(html,'html.parser').find('div',id='main').find('a').get('href')
    while True:
        html=session.get(url).text
        if 'Cluster Data' in html:
            try:
                os.mkdir('result')
            except:
                pass
            f=open('result/%s.txt'%filename,'w',encoding='utf-8')
            result=BeautifulSoup(html,'html.parser').find('td',{'align':'center'}).find('table').find_all('tr')
            for tr in result:
                for td in tr.find_all('td'):
                    f.write(td.get_text().replace("\r","").replace("\n","")+'\t')
                f.write("\r\n")
            f.close()
            print(filename,'ok')
            return
        print(filename,'sleep')
        time.sleep(15)

def main():
    for filename in os.listdir(' pdb_dir '):
        try:
            upload(filename)
        except:
            failed=open('failed.txt','a',encoding='utf-8')

```

```
failed.write(filename+'\n')
failed.close()

main()
```

**Table S3. Python script for uploading proteins, setting parameters and downloading prediction results from the SiteHound web server automatically.**

| Region | $\Phi_{min}$ | $\Phi_{max}$ | $\Psi_{min}$ | $\Psi_{max}$ |
|--------|--------------|--------------|--------------|--------------|
| 01     | -180         | -135         | 136          | 180          |
| 02     | -135         | -105         | 150          | 180          |
| 03     | -175         | -135         | 95           | 136          |
| 04     | -135         | -87          | 95           | 150          |
| 05     | -87          | -30          | 95           | 180          |
| 06     | -170         | -113         | 50           | 95           |
| 07     | -113         | -60          | 50           | 95           |
| 08     | -150         | -67          | 8            | 40           |
| 09     | -150         | -107         | -32          | 8            |
| 10     | -107         | -40          | -12          | 8            |
| 11     | -107         | -40          | -32          | -12          |
| 12     | -165         | -95          | -70          | -32          |
| 13     | -95          | -40          | -70          | -32          |
| 14     | -180         | -135         | -180         | -160         |
| 15     | -100         | -60          | -180         | -150         |
| 16     | 60           | 120          | 150          | 180          |
| 17     | 38           | 140          | -25          | 75           |
| 18     | 55           | 95           | -100         | -40          |
| 19     | 35           | 100          | -180         | -110         |

**Table S4. Detailed information for the twenty regions defined by DISICL.** Angles are shown in degrees, and the rest of the Ramachandran plot constitutes the 20<sup>th</sup> region.

| AA name | At Name | High-accessibility | Low-accessibility |
|---------|---------|--------------------|-------------------|
| A       | N       | 0.80               | 0.58              |
| A       | CA      | 0.70               | 0.43              |
| A       | C       | 0.44               | 0.33              |
| A       | O       | 0.83               | 0.50              |
| A       | CB      | 1.93               | 1.14              |
| C       | N       | 0.55               | 0.43              |
| C       | CA      | 0.59               | 0.45              |
| C       | C       | 0.36               | 0.42              |
| C       | O       | 0.77               | 0.71              |
| C       | CB      | 1.68               | 0.49              |
| C       | SG      | 2.38               | 1.01              |
| D       | N       | 0.47               | 0.14              |
| D       | CA      | 0.43               | 0.20              |
| D       | C       | 0.27               | 0.15              |
| D       | O       | 0.43               | 0.14              |
| D       | CB      | 0.55               | 0.20              |
| D       | CG      | 1.19               | 1.43              |
| D       | OD1     | 1.69               | 2.22              |
| D       | OD2     | 1.84               | 2.79              |
| E       | N       | 0.24               | 0.09              |
| E       | CA      | 0.27               | 0.17              |
| E       | C       | 0.25               | 0.16              |
| E       | O       | 0.61               | 0.15              |
| E       | CB      | 0.28               | 0.13              |
| E       | CG      | 0.46               | 0.22              |
| E       | CD      | 0.86               | 1.29              |
| E       | OE1     | 1.16               | 2.16              |
| E       | OE2     | 1.28               | 2.24              |
| F       | N       | 0.23               | 0.22              |



|   |     |      |      |
|---|-----|------|------|
| F | CA  | 0.23 | 0.18 |
| F | C   | 0.17 | 0.18 |
| F | O   | 0.29 | 0.31 |
| F | CB  | 0.61 | 0.28 |
| F | CG  | 0.65 | 0.20 |
| F | CD1 | 1.00 | 0.34 |
| F | CD2 | 0.97 | 0.38 |
| F | CE1 | 1.36 | 0.59 |
| F | CE2 | 1.26 | 0.61 |
| F | CZ  | 1.47 | 0.75 |
| G | N   | 1.56 | 0.93 |
| G | CA  | 2.28 | 1.27 |
| G | C   | 1.10 | 0.70 |
| G | O   | 1.11 | 0.53 |
| H | N   | 0.28 | 0.13 |
| H | CA  | 0.27 | 0.14 |
| H | C   | 0.23 | 0.12 |
| H | O   | 0.38 | 0.22 |
| H | CB  | 0.62 | 0.23 |
| H | CG  | 0.61 | 0.22 |
| H | ND1 | 1.03 | 0.50 |
| H | CD2 | 1.11 | 0.81 |
| H | CE1 | 1.61 | 1.17 |
| H | NE2 | 1.83 | 1.69 |
| I | N   | 0.40 | 0.33 |
| I | CA  | 0.25 | 0.21 |
| I | C   | 0.14 | 0.22 |
| I | O   | 0.39 | 0.49 |
| I | CB  | 0.41 | 0.21 |
| I | CG1 | 0.78 | 0.36 |
| I | CG2 | 1.09 | 0.62 |
| I | CD1 | 1.59 | 0.71 |

|   |     |      |      |
|---|-----|------|------|
| K | N   | 0.45 | 0.94 |
| K | CA  | 0.40 | 0.35 |
| K | C   | 0.18 | 0.22 |
| K | O   | 0.30 | 0.09 |
| K | CB  | 0.45 | 0.45 |
| K | CG  | 0.58 | 0.27 |
| K | CD  | 0.62 | 0.33 |
| K | CE  | 1.17 | 1.40 |
| K | NZ  | 1.72 | 3.19 |
| L | N   | 0.37 | 0.35 |
| L | CA  | 0.24 | 0.21 |
| L | C   | 0.24 | 0.24 |
| L | O   | 0.48 | 0.54 |
| L | CB  | 0.47 | 0.31 |
| L | CG  | 0.34 | 0.17 |
| L | CD1 | 1.35 | 0.64 |
| L | CD2 | 1.13 | 0.62 |
| M | N   | 0.42 | 0.41 |
| M | CA  | 0.33 | 0.26 |
| M | C   | 0.24 | 0.19 |
| M | O   | 0.51 | 0.45 |
| M | CB  | 0.71 | 0.39 |
| M | CG  | 0.79 | 0.50 |
| M | SD  | 1.11 | 0.72 |
| M | CE  | 1.42 | 0.89 |
| N | N   | 0.46 | 0.23 |
| N | CA  | 0.36 | 0.21 |
| N | C   | 0.28 | 0.16 |
| N | O   | 0.48 | 0.22 |
| N | CB  | 0.67 | 0.31 |
| N | CG  | 0.90 | 0.81 |
| N | OD1 | 1.32 | 1.25 |

|   |     |      |      |
|---|-----|------|------|
| N | ND2 | 1.77 | 1.74 |
| P | N   | 0.20 | 0.18 |
| P | CA  | 0.34 | 0.28 |
| P | C   | 0.27 | 0.37 |
| P | O   | 0.59 | 0.59 |
| P | CB  | 0.62 | 0.56 |
| P | CG  | 0.98 | 0.69 |
| P | CD  | 0.99 | 0.73 |
| Q | N   | 0.40 | 0.17 |
| Q | CA  | 0.36 | 0.14 |
| Q | C   | 0.26 | 0.12 |
| Q | O   | 0.46 | 0.19 |
| Q | CB  | 0.54 | 0.19 |
| Q | CG  | 0.67 | 0.28 |
| Q | CD  | 0.88 | 0.80 |
| Q | OE1 | 1.19 | 1.37 |
| Q | NE2 | 1.45 | 1.64 |
| R | N   | 0.39 | 0.13 |
| R | CA  | 0.28 | 0.11 |
| R | C   | 0.18 | 0.08 |
| R | O   | 0.28 | 0.13 |
| R | CB  | 0.46 | 0.14 |
| R | CG  | 0.52 | 0.18 |
| R | CD  | 0.79 | 0.48 |
| R | NE  | 1.09 | 0.70 |
| R | CZ  | 1.25 | 1.69 |
| R | NH1 | 1.22 | 2.21 |
| R | NH2 | 1.66 | 2.72 |
| S | N   | 0.88 | 0.61 |
| S | CA  | 0.73 | 0.55 |
| S | C   | 0.41 | 0.37 |
| S | O   | 0.54 | 0.42 |

|   |     |      |      |
|---|-----|------|------|
| S | CB  | 1.45 | 0.98 |
| S | OG  | 2.13 | 1.74 |
| T | N   | 0.72 | 0.63 |
| T | CA  | 0.56 | 0.45 |
| T | C   | 0.37 | 0.30 |
| T | O   | 0.57 | 0.39 |
| T | CB  | 0.99 | 0.69 |
| T | OG1 | 1.87 | 1.48 |
| T | CG2 | 1.09 | 0.62 |
| V | N   | 0.42 | 0.57 |
| V | CA  | 0.27 | 0.27 |
| V | C   | 0.20 | 0.27 |
| V | O   | 0.51 | 0.59 |
| V | CB  | 0.47 | 0.26 |
| V | CG1 | 1.23 | 0.61 |
| V | CG2 | 1.41 | 0.70 |
| W | N   | 0.20 | 0.16 |
| W | CA  | 0.24 | 0.13 |
| W | C   | 0.22 | 0.12 |
| W | O   | 0.40 | 0.19 |
| W | CB  | 0.58 | 0.20 |
| W | CG  | 0.65 | 0.26 |
| W | CD1 | 0.94 | 0.55 |
| W | CD2 | 0.90 | 0.35 |
| W | NE1 | 1.37 | 0.94 |
| W | CE2 | 1.18 | 0.66 |
| W | CE3 | 1.02 | 0.35 |
| W | CZ2 | 1.32 | 0.89 |
| W | CZ3 | 1.09 | 0.48 |
| W | CH2 | 1.16 | 0.69 |
| Y | N   | 0.25 | 0.12 |
| Y | CA  | 0.28 | 0.14 |

|   |     |      |      |
|---|-----|------|------|
| Y | C   | 0.19 | 0.11 |
| Y | O   | 0.32 | 0.16 |
| Y | CB  | 0.60 | 0.20 |
| Y | CG  | 0.61 | 0.16 |
| Y | CD1 | 0.92 | 0.30 |
| Y | CD2 | 0.90 | 0.28 |
| Y | CE1 | 1.13 | 0.58 |
| Y | CE2 | 1.10 | 0.61 |
| Y | CZ  | 1.09 | 0.72 |
| Y | OH  | 1.87 | 1.80 |

**Table S5. Average number of *vdW* contacts between ligands and high-accessibility or low-accessibility residues.**

| PDB_Chain | Ligand | MF-PLB | Ligsite-csc | MPK2 | ConCavity | Q-SiteFinder | Surfn et | LISE | PLB | SiteHound |
|-----------|--------|--------|-------------|------|-----------|--------------|----------|------|-----|-----------|
| 1cb0_A    | ADE    | 1      | 1           | 1    | 1         | 1            | 44       | 1    | 1   | N         |
| 1cea_A    | ACA    | N      | N           | 5    | 2         | 1            | 4        | N    | N   | 2         |
| 1chm_A    | CMS    | 1      | 1           | 3    | 2         | 2            | 4        | 1    | 1   | 1         |
| 1esd_A    | VXA    | 1      | 1           | 1    | 1         | N            | N        | 1    | 1   | 1         |
| 1fur_A    | MLT    | 7      | 12          | N    | 5         | N            | N        | 4    | 12  | N         |
| 1gxu_A    | 2HP    | 1      | 1           | 6    | 3         | 5            | 7        | N    | 1   | N         |
| 1izc_A    | PYR    | 1      | 1           | N    | 1         | N            | N        | 2    | 1   | 8         |
| 1jlt_A    | MRD    | 1      | 1           | 1    | 1         | 1            | 1        | 2    | 1   | 1         |
| 1lo6_A    | BEN    | 1      | 1           | 1    | 1         | 1            | N        | 1    | 2   | 2         |
| 1lpd_A    | ADE    | 1      | 1           | 1    | 1         | 1            | N        | 1    | 1   | 1         |
| 1m3u_A    | KPL    | 1      | 1           | 1    | 1         | 1            | 1        | 2    | 1   | 1         |
| 1n2m_A    | MRD    | 6      | 6           | N    | N         | 6            | 7        | 4    | 5   | 5         |
| 1nki_A    | PPF    | 1      | 4           | 5    | 2         | N            | 2        | 1    | 2   | 3         |
| 1o4t_A    | OXL    | 1      | 1           | 1    | 1         | 1            | 1        | 1    | 1   | 4         |
| 1o6e_A    | ISP    | 2      | 2           | 1    | 1         | 3            | 43       | 2    | 2   | N         |
| 1o9p_A    | MLA    | 1      | 6           | 3    | 1         | 3            | N        | 2    | 3   | N         |
| 1oi0_A    | 144    | 4      | 4           | 2    | 1         | 5            | 2        | 1    | 5   | 3         |
| 1otj_A    | TAU    | 3      | 3           | 2    | N         | 2            | N        | 1    | 2   | N         |
| 1p6o_A    | HPY    | 1      | 1           | 3    | N         | 4            | 7        | 1    | 1   | 9         |
| 1pot_A    | SPD    | 2      | 3           | 3    | N         | 5            | N        | 1    | 2   | 3         |
| 1r9l_A    | BET    | 1      | 3           | 2    | 2         | 5            | 1        | 1    | 1   | 2         |
| 1rcd_A    | BET    | 4      | 6           | 5    | N         | 7            | 7        | 7    | 9   | 6         |
| 1rd5_A    | MLA    | 3      | 2           | 2    | N         | 3            | N        | 2    | 2   | 9         |
| 1ryo_A    | OXL    | 7      | 26          | N    | N         | N            | N        | N    | 7   | N         |
| 1s7f_A    | MLA    | 2      | 1           | N    | N         | N            | N        | 8    | 2   | N         |
| 1sgj_A    | OAA    | 1      | 1           | 1    | 1         | 1            | N        | 1    | 1   | 2         |
| 1tkj_A    | MED    | 1      | 1           | 1    | 1         | 1            | 1        | 1    | 1   | 1         |
| 1tt8_A    | PHB    | 1      | 2           | 1    | 1         | 2            | 5        | 5    | 2   | 4         |

|        |     |    |    |   |   |    |    |   |    |   |
|--------|-----|----|----|---|---|----|----|---|----|---|
| 1w6l_A | PYC | 2  | 10 | N | N | 7  | 16 | 4 | 2  | N |
| 1w6f_A | ISZ | 1  | 1  | 1 | 1 | 1  | N  | 1 | 1  | 2 |
| 1wzu_A | MLT | 1  | 1  | 1 | 1 | N  | N  | 1 | 1  | 4 |
| 1xff_A | ACT | 1  | 1  | 1 | 1 | 1  | 4  | 1 | 1  | 1 |
| 1zei_A | CRS | 5  | 5  | 2 | 2 | 3  | 2  | 6 | 5  | 1 |
| 1zuw_A | DGL | 1  | 2  | 1 | 2 | 1  | 3  | 1 | 1  | 6 |
| 2a1x_A | AKG | 1  | 1  | 1 | 1 | 1  | N  | 1 | 1  | 1 |
| 2ayd_A | SIN | 11 | 8  | N | N | 6  | 5  | 2 | 6  | 5 |
| 2b4l_A | BET | 1  | 1  | 3 | 2 | 2  | 3  | 1 | 1  | 1 |
| 2cks_A | BEN | 1  | 1  | 1 | 1 | 3  | 2  | 2 | 1  | 1 |
| 2cw6_A | 3HG | 1  | 1  | 1 | 1 | 1  | 1  | 1 | 1  | 1 |
| 2dt9_B | ACT | 8  | 2  | 2 | N | 1  | 5  | 5 | 4  | 3 |
| 2f8a_A | MLA | 15 | 13 | N | N | N  | N  | 2 | 15 | N |
| 2g3f_A | IZC | 2  | 3  | 3 | N | 3  | N  | 1 | 2  | N |
| 2gll_A | BEN | 17 | 14 | 6 | N | 6  | 8  | N | 17 | 5 |
| 2gm8_A | HMH | 1  | 2  | 5 | 1 | 3  | N  | 1 | 1  | 4 |
| 2gso_A | VO4 | 1  | 1  | 1 | 1 | N  | N  | 2 | 1  | N |
| 2gzm_A | DGL | 1  | 5  | 3 | 2 | 1  | N  | 1 | 1  | 5 |
| 2h8g_A | ADE | 1  | 1  | 1 | 1 | 12 | N  | 2 | 1  | 1 |
| 2hfu_A | MEV | 1  | 1  | 1 | 1 | N  | N  | 2 | 1  | 6 |
| 2hzl_A | PYR | 2  | 3  | 5 | N | 10 | 14 | 4 | 3  | N |
| 2ifc_A | OAA | 1  | 1  | 1 | 1 | 1  | 1  | 1 | 1  | 2 |
| 2iwz_A | 6NA | 3  | 4  | N | N | 1  | 23 | 3 | 3  | 9 |
| 2ix4_A | 6NA | 5  | 7  | N | N | 1  | N  | 4 | 6  | N |
| 2j13_A | CAC | 2  | 1  | 1 | 1 | 1  | 1  | 2 | 2  | 2 |
| 2jfq_A | DGL | 1  | 1  | 1 | 1 | 2  | N  | 1 | 1  | N |
| 2oq5_A | BEN | 2  | 2  | 1 | 1 | 1  | N  | 2 | 2  | 1 |
| 2p18_A | SPD | 3  | 5  | 7 | N | 3  | 6  | 1 | 3  | 1 |
| 2p3x_A | C2O | 2  | 35 | N | N | N  | N  | 1 | 2  | N |
| 2pka_B | BEN | 3  | 3  | 6 | N | 4  | N  | 2 | 3  | 2 |
| 2pqj_A | ADE | 1  | 1  | 1 | 1 | 1  | 1  | 1 | 1  | 1 |
| 2qfy_A | AKG | 1  | 5  | 2 | 1 | 7  | 1  | 1 | 4  | 1 |

|        |     |    |    |   |   |    |    |   |    |   |
|--------|-----|----|----|---|---|----|----|---|----|---|
| 2qhs_A | OCA | 1  | 1  | 1 | 1 | 2  | 1  | 1 | 1  | 1 |
| 2qrl_A | OGA | 1  | 1  | 1 | 1 | 2  | N  | 1 | 1  | 7 |
| 2ra6_A | ETY | 2  | 2  | 2 | 1 | 1  | 2  | 1 | 2  | 1 |
| 2rin_A | ACH | 1  | 2  | 2 | 3 | 2  | 14 | 1 | 1  | 2 |
| 2v3u_A | DSN | 2  | 1  | 1 | 2 | 2  | 1  | 2 | 2  | N |
| 2v62_A | SIN | 22 | 10 | N | N | 18 | N  | 9 | 22 | N |
| 2veq_A | CAC | 9  | 10 | N | N | N  | 7  | 6 | 7  | N |
| 2vkl_A | MLT | 1  | 1  | 1 | 1 | 1  | 1  | 1 | 1  | 1 |
| 2vw8_A | CAC | 1  | 1  | 1 | 1 | 1  | 1  | 1 | 1  | N |
| 2wl9_B | MBD | 1  | 1  | 1 | 1 | N  | 26 | 1 | 1  | 2 |
| 2wmm_A | MLT | 5  | 12 | 7 | N | N  | 3  | 9 | 8  | 8 |
| 2xrh_A | NIO | 1  | 1  | 1 | 1 | 1  | N  | 4 | 1  | 1 |
| 2xz9_A | PYR | 1  | 1  | N | N | 19 | N  | 1 | 1  | 2 |
| 2yzo_A | MLT | 1  | 1  | 1 | 1 | 1  | N  | 1 | 1  | 1 |
| 2zzv_A | LAC | 3  | 6  | N | N | 12 | 17 | 1 | 4  | N |
| 3ali_A | UNU | 1  | 2  | 5 | N | 3  | N  | N | 1  | 5 |
| 3aal_A | CAC | 1  | 1  | 1 | 1 | 2  | N  | 1 | 1  | 1 |
| 3au7_A | AG2 | 32 | 45 | N | N | 2  | N  | 1 | 43 | 1 |
| 3b7o_A | MLT | 1  | 3  | 2 | 2 | 2  | N  | 1 | 1  | 2 |
| 3bf8_A | MLA | 1  | 1  | 2 | N | 2  | N  | 1 | 1  | 8 |
| 3bsf_A | ADE | 1  | 1  | 1 | 1 | 1  | 1  | 2 | 1  | 1 |
| 3by8_A | MLT | 1  | 2  | 5 | 2 | 4  | 8  | 1 | 1  | 6 |
| 3ct4_A | 2HA | 1  | 8  | 6 | N | N  | N  | 2 | 4  | 2 |
| 3dg6_A | MUC | 1  | 2  | 5 | 2 | 6  | 8  | 1 | 3  | N |
| 3dmo_A | MRD | 1  | 1  | 1 | 1 | 1  | 1  | 2 | 1  | 1 |
| 3dr3_A | MLT | 6  | 8  | N | N | N  | 13 | 3 | 6  | 3 |
| 3erp_A | CAC | 24 | 6  | 2 | N | 5  | 2  | 1 | 23 | 3 |
| 3fpc_A | CAC | 2  | 33 | N | N | N  | 9  | 1 | 22 | 1 |
| 3gf2_A | SAL | 19 | 13 | 5 | N | 3  | N  | 1 | 19 | N |
| 3gn9_A | MLT | 3  | 4  | 3 | 2 | 2  | 2  | 2 | 4  | 2 |
| 3h78_A | BE2 | N  | N  | 1 | 1 | 1  | N  | 6 | N  | N |
| 3ktm_A | BU4 | N  | N  | 8 | N | 3  | N  | N | N  | N |



|        |     |    |    |   |   |   |    |    |    |    |
|--------|-----|----|----|---|---|---|----|----|----|----|
| 3lqv_A | ADE | 1  | 1  | 1 | 3 | 1 | 1  | 1  | 1  | 2  |
| 3n5f_B | CAC | 1  | 1  | 1 | 1 | 1 | 39 | 1  | 1  | 1  |
| 3nnf_A | AKG | 2  | 1  | 2 | 1 | 3 | 6  | 1  | 1  | 1  |
| 3obz_A | AKG | N  | N  | 4 | N | 2 | N  | 1  | N  | 1  |
| 3og9_A | MLT | 1  | 1  | 1 | 1 | 1 | 1  | 1  | 1  | 9  |
| 3opt_A | AKG | 1  | 1  | 1 | 1 | 1 | N  | 1  | 1  | 1  |
| 3pb6_X | CAC | 1  | 1  | 1 | 1 | N | N  | 1  | 3  | 1  |
| 3plx_B | PEG | 3  | 4  | 4 | N | 5 | 2  | 4  | 5  | 7  |
| 3pua_A | OGA | 4  | 4  | 3 | N | 1 | 2  | 1  | 4  | 2  |
| 3q12_A | PAF | 1  | 1  | 1 | 1 | 2 | N  | 1  | 1  | 1  |
| 3r2j_A | NIO | 1  | 1  | 1 | 1 | 1 | 2  | 1  | 1  | 1  |
| 3r6u_A | CHT | 1  | 1  | 1 | 1 | 5 | 1  | 1  | 1  | 1  |
| 3r9r_A | MRD | 1  | 1  | 1 | 1 | 1 | 1  | 1  | 1  | 2  |
| 3r9t_A | BEZ | 1  | 1  | 1 | 1 | N | 1  | N  | 1  | N  |
| 3rys_A | ADE | 1  | 2  | 2 | 3 | 2 | N  | 1  | 1  | N  |
| 3s99_A | ADE | 3  | 5  | 5 | 1 | 2 | 3  | 1  | 3  | 6  |
| 3t7y_A | SIN | 5  | 2  | 5 | N | 3 | 21 | 10 | 4  | 2  |
| 3tht_A | AKG | 2  | 2  | 8 | 2 | 4 | 4  | 1  | 2  | 3  |
| 3tmg_A | BET | 4  | 2  | 2 | 2 | 1 | 4  | 1  | 3  | 6  |
| 3vsj_B | 2XP | 1  | 1  | 1 | 1 | 2 | 1  | 1  | 1  | 1  |
| 3w36_A | VO4 | 1  | 5  | N | 4 | N | N  | 1  | 4  | N  |
| 3war_A | NIO | 2  | 2  | 4 | N | 1 | 2  | 1  | 2  | 1  |
| 3wwx_A | DIA | 1  | 1  | 1 | N | 1 | 1  | 2  | 1  | 1  |
| 3zfp_A | SGM | 8  | 8  | N | N | N | 7  | N  | 5  | 9  |
| 3zha_A | SIN | 7  | 3  | 2 | 1 | 8 | 2  | N  | 4  | 5  |
| 3zmd_A | SAL | 16 | 10 | 5 | N | N | 3  | 3  | 16 | N  |
| 3zs3_A | SIN | 1  | 1  | 1 | 1 | 1 | 1  | 1  | 1  | 2  |
| 3zxf_A | ACT | 2  | 5  | 4 | N | 7 | 2  | 6  | 4  | 4  |
| 4a9v_A | FEO | 5  | 3  | 3 | 3 | 2 | 13 | 1  | 5  | 2  |
| 4buh_A | PEG | 22 | 16 | 4 | 3 | N | 2  | 2  | 22 | N  |
| 4bxf_A | AKG | N  | N  | 8 | 2 | 4 | N  | 1  | N  | 3  |
| 4c0z_A | SPD | 6  | 13 | N | N | N | 14 | 10 | 4  | 10 |

|        |     |    |    |   |   |    |    |    |    |    |
|--------|-----|----|----|---|---|----|----|----|----|----|
| 4cck_A | OGA | 1  | 1  | 2 | N | 3  | 1  | 1  | 1  | 1  |
| 4ccw_A | VKC | 1  | 1  | N | 1 | 5  | N  | 1  | 1  | N  |
| 4dbh_A | OXL | 1  | 2  | 2 | 2 | 3  | 2  | 1  | 2  | N  |
| 4e2s_A | UGY | 1  | 2  | 1 | 1 | 2  | 4  | 1  | 1  | 7  |
| 4erc_A | VN4 | 1  | 1  | 1 | 1 | N  | 6  | 9  | 1  | N  |
| 4f0d_A | 3AB | 4  | 4  | N | N | 10 | N  | 1  | 4  | 3  |
| 4fbl_A | SPD | 1  | 1  | 1 | 1 | 2  | 1  | 2  | 1  | 5  |
| 4fq5_A | MAE | 1  | 1  | 1 | 2 | 3  | N  | 10 | 1  | N  |
| 4giz_A | AKG | 14 | 18 | N | N | 4  | 17 | 1  | 18 | 1  |
| 4hdr_A | DMD | 1  | 1  | 1 | 1 | 1  | 43 | 6  | 1  | 2  |
| 4hkg_A | MRD | 1  | 1  | 1 | 1 | 1  | 2  | 1  | 1  | 1  |
| 4hwh_A | MLA | 3  | 1  | 1 | 1 | N  | 1  | 1  | 1  | 2  |
| 4j25_A | OGA | 1  | 1  | 1 | 1 | 1  | 1  | 1  | 1  | 3  |
| 4jdf_A | SPD | 1  | 1  | 1 | 1 | 1  | 1  | 1  | 1  | 1  |
| 4k91_A | SIN | 3  | 3  | 2 | 2 | 11 | 2  | 1  | 3  | 3  |
| 4lit_A | AKG | 1  | 2  | 1 | 1 | 3  | 1  | 1  | 1  | 1  |
| 4lw1_A | ACT | 2  | 1  | 2 | 2 | 1  | 1  | 1  | 1  | 3  |
| 4m25_A | AKG | N  | N  | 5 | 1 | N  | N  | 6  | N  | 1  |
| 4m4g_A | PEG | 1  | 1  | 2 | 2 | 1  | 4  | 1  | 1  | 8  |
| 4mx6_A | SIN | 1  | 2  | 5 | N | 3  | 22 | 1  | 2  | N  |
| 4npl_A | AKG | 1  | 1  | 1 | 1 | 2  | N  | 1  | 1  | 7  |
| 4nrp_A | OGA | 1  | 1  | 1 | 1 | 1  | 49 | 1  | 1  | 1  |
| 4ov4_A | KIV | 1  | 2  | 2 | 2 | 3  | N  | 1  | 2  | 3  |
| 4ptn_A | GXV | 1  | 1  | 1 | 1 | 1  | 1  | 1  | 1  | 2  |
| 4qhq_A | PEG | 1  | 2  | 2 | 1 | 1  | 3  | 1  | 1  | 2  |
| 4qu2_A | AKG | 1  | 2  | N | N | N  | N  | 1  | 1  | 3  |
| 4r17_K | 3K4 | 1  | 1  | 1 | 1 | 5  | N  | 3  | 1  | 1  |
| 4tgl_A | DEP | 1  | 1  | 1 | 1 | N  | 1  | 1  | 1  | 1  |
| 4uqw_A | BEN | 21 | 18 | 5 | 1 | N  | 9  | 4  | 15 | N  |
| 4wwq_A | MLA | 3  | 4  | 1 | 1 | N  | 2  | 2  | 4  | 10 |
| 4xdq_A | BEZ | 1  | 1  | 1 | 1 | 1  | 12 | 1  | 1  | 1  |
| 4xez_A | THJ | 1  | 3  | 1 | N | N  | 1  | 1  | 1  | N  |

|        |     |    |    |   |    |    |    |   |    |   |
|--------|-----|----|----|---|----|----|----|---|----|---|
| 4yi7_A | BE2 | 1  | 1  | 1 | 1  | 3  | 1  | 1 | 1  | 2 |
| 4yn5_A | CAC | 1  | 1  | 1 | 1  | 4  | N  | 1 | 1  | 2 |
| 4z67_A | MLT | 1  | 1  | 1 | 1  | 1  | 1  | 1 | 1  | 1 |
| 4zch_A | 144 | 3  | 4  | N | N  | 6  | 7  | 1 | 5  | 3 |
| 4zxa_W | H8N | 2  | 3  | 2 | 2  | 2  | N  | 1 | 2  | N |
| 5a0u_A | CHT | 8  | 9  | N | 11 | 18 | 26 | 1 | 5  | N |
| 5c5t_A | AKG | 1  | 1  | 1 | 1  | 3  | 2  | 1 | 1  | 3 |
| 5cge_A | 51F | 16 | 26 | 5 | N  | N  | 31 | N | 17 | 4 |
| 5cta_A | BM0 | 11 | 2  | 3 | 3  | 2  | 3  | 2 | 11 | 4 |
| 5dmp_A | VN4 | 1  | 1  | 1 | 1  | 1  | 4  | 1 | 1  | 1 |
| 5i8t_A | LAC | 1  | 1  | 1 | 1  | 1  | 2  | 1 | 1  | 1 |
| 5im2_A | BEZ | 1  | 1  | 2 | 3  | 6  | 1  | 2 | 1  | 9 |
| 5j39_A | CAC | 1  | 1  | 2 | 1  | 3  | 3  | 1 | 2  | 5 |

**Table S6. Detailed information of small-volume ligand-binding site prediction**

**using the MF-PLB, PLB, Ligsite-csc, MPK2, ConCavity, Surfnct, Q-SiteFinder,**

**LISE and SiteHound.** The numbers in the table reflect the ranking of the actual

ligand-binding site, and “N” indicates that the ligand-binding site was not found using

the method.

| PDB_Chain | Ligand              | MF-PLB | Ligsite-csc | MPK2 | ConCavity | Q-Site Finder | Surfn et | LISE | PLB | SiteHound |
|-----------|---------------------|--------|-------------|------|-----------|---------------|----------|------|-----|-----------|
| 1ab8AB    | FOK                 | 1      | 1           | 1    | 1         | 1             | 1        | 1    | 1   | 1         |
| 1aj8AB    | COA,<br>CIT         | 1      | 1           | 1    | 1         | 1             | 2        | 1    | 1   | 1         |
| 1b57AB    | PGH                 | 2      | 3           | 3    | 3         | 2             | N        | 1    | 2   | 10        |
| 1b8gAB    | PLP                 | N      | N           | N    | N         | 9             | N        | 1    | N   | N         |
| 1bcpKL    | ATP                 | 1      | 1           | 1    | 1         | 1             | 39       | 1    | 1   | 1         |
| 1bh5AB    | GTX                 | 1      | 1           | 1    | 1         | 3             | N        | 1    | 1   | 1         |
| 1buiAC    | OGJ                 | 2      | 2           | 5    | 2         | 7             | N        | 2    | 2   | 5         |
| 1bw0AB    | LLP                 | 1      | 1           | 1    | 2         | 1             | 1        | 1    | 1   | 1         |
| 1byeCD    | ATA                 | N      | N           | 5    | N         | 4             | N        | 1    | N   | 6         |
| 1c7gAC    | PLP                 | N      | N           | N    | N         | 4             | N        | 3    | N   | N         |
| 1c7oCD    | PPG                 | 22     | 52          | 3    | N         | 2             | N        | 1    | 20  | 5         |
| 1chmAB    | CMS                 | 3      | 9           | N    | N         | 8             | 15       | 1    | 3   | N         |
| 1csmAB    | TRP                 | 1      | 1           | 2    | N         | 1             | N        | 3    | 1   | 5         |
| 1d2fAB    | PLP                 | N      | N           | 2    | N         | 2             | N        | 1    | N   | 5         |
| 1dcpEF    | HBI                 | 1      | 1           | 1    | 1         | 1             | 2        | 1    | 2   | 1         |
| 1dlmAB    | LIO                 | 1      | 1           | 1    | 1         | 1             | 1        | N    | 1   | 4         |
| 1dqaCD    | COA,<br>NAP,<br>MAH | 1      | 1           | 1    | 1         | 1             | N        | 1    | 1   | 1         |
| 1dqxCD    | BMP                 | 1      | 1           | 1    | 1         | 1             | N        | 1    | 1   | 1         |
| 1dtyAB    | PLP                 | 20     | 48          | N    | N         | N             | N        | 4    | 37  | N         |
| 1dugAB    | GSH                 | N      | N           | N    | N         | 1             | N        | 3    | N   | 1         |
| 1e0jBC    | ANP                 | 1      | 1           | 1    | 1         | 2             | N        | 1    | 1   | 1         |
| 1e5fAB    | PLP                 | 3      | 7           | 5    | N         | 1             | N        | 1    | 3   | N         |
| 1ecmAB    | TSA                 | 1      | 1           | 1    | 1         | 3             | 1        | 1    | 1   | 1         |
| 1eixAB    | BMQ                 | 1      | 1           | 1    | 1         | 1             | 2        | 1    | 2   | 4         |
| 1ewjEF    | BLM                 | 1      | 1           | 2    | 1         | 1             | 2        | 1    | 2   | 1         |
| 1f34AB    | SEP,M               | 40     | 44          | N    | N         | 1             | N        | 1    | 45  | 3         |

|        |             |    |    |   |   |   |   |   |    |   |
|--------|-------------|----|----|---|---|---|---|---|----|---|
|        | PD          |    |    |   |   |   |   |   |    |   |
| 1f5vAB | FMN         | 1  | 1  | 1 | 1 | 1 | 1 | 1 | 1  | 1 |
| 1fc4AB | AKB,<br>PLP | 1  | 1  | 2 | N | 3 | N | 1 | 1  | 4 |
| 1ft9AB | HEM         | 1  | 3  | 1 | 1 | 1 | N | 4 | 1  | 2 |
| 1g5cAB | EPE         | 3  | 4  | 7 | 2 | 5 | 5 | 5 | 2  | 5 |
| 1g64AB | B12,A<br>TP | 1  | 1  | 1 | 1 | 1 | 1 | 1 | 1  | N |
| 1grnAB | GDP,A<br>F3 | N  | N  | 2 | N | 1 | 1 | 2 | N  | 3 |
| 1gufAB | NDP         | 1  | 1  | 1 | 1 | 1 | N | 1 | 1  | 1 |
| 1guqCD | UPG         | 1  | 2  | 3 | 2 | 3 | N | 1 | 2  | 1 |
| 1gyxAB | BEZ,E<br>PE | 2  | 1  | 1 | 2 | 1 | 2 | 1 | 1  | 1 |
| 1gztAB | FUC         | 1  | 3  | 5 | 1 | N | 1 | 1 | 2  | 1 |
| 1he1AC | GDP,A<br>F3 | 1  | 1  | 4 | 1 | 1 | 1 | 1 | 1  | 1 |
| 1hkvAB | LYS,P<br>LP | 1  | 1  | 1 | 1 | 1 | N | 1 | 1  | 3 |
| 1hw5AB | CMP         | 5  | 7  | 2 | 2 | 5 | 1 | 6 | 5  | 3 |
| 1i69AB | BEZ         | 1  | 1  | 1 | 1 | N | 1 | 1 | 1  | 1 |
| 1idtAB | FMN,<br>CB1 | 1  | 1  | 1 | 1 | 1 | N | 1 | 1  | 2 |
| 1ig3AB | VIB         | 1  | 1  | 1 | 1 | 1 | N | 1 | 1  | 1 |
| 1iugAB | LLP         | 45 | 48 | N | N | 2 | N | 2 | 41 | 1 |
| 1iyiAD | GSH         | N  | N  | 6 | N | 1 | N | 1 | N  | 4 |
| 1j2gAB | AZA         | N  | N  | N | 2 | 9 | N | 1 | N  | 1 |
| 1j6wAB | MET         | 1  | 1  | 1 | 1 | 1 | 1 | 1 | 1  | 1 |
| 1jlrBD | GTP         | 3  | 5  | 6 | N | 5 | 4 | 5 | 4  | 2 |
| 1js6AB | PLP         | N  | N  | 1 | 1 | 1 | N | 1 | N  | 2 |
| 1jwbBD | AMP         | N  | N  | N | N | 4 | N | 1 | N  | 1 |
| 1k0cAB | GTB         | 1  | 1  | 1 | 1 | 1 | 2 | 2 | 1  | 1 |

|        |             |    |    |   |   |    |    |    |    |   |
|--------|-------------|----|----|---|---|----|----|----|----|---|
| 1knyAB | APC,<br>KAN | 1  | 1  | 1 | 1 | 1  | 1  | 1  | 1  | 1 |
| 1kpeAB | ADW         | 1  | 2  | 1 | 1 | 1  | 1  | 1  | 1  | 1 |
| 1lluAB | NAD         | 1  | 1  | 1 | 1 | 2  | N  | 2  | 1  | 3 |
| 1m32AB | PLP,P<br>OA | 9  | 29 | 5 | 2 | 2  | N  | 1  | 20 | 4 |
| 1mkaAB | DAC         | 1  | 1  | 1 | 1 | 1  | 2  | 1  | 1  | 3 |
| 1n2fAB | DTT         | 1  | 1  | 1 | 1 | 1  | 3  | 1  | 1  | 1 |
| 1nbfBC | GLZ         | 32 | 54 | N | N | N  | 23 | N  | 39 | N |
| 1ni4AD | TPP         | 1  | 1  | 1 | 1 | 1  | 1  | 1  | 1  | 8 |
| 1nkiAB | PPF         | 1  | 1  | 1 | 1 | 1  | 2  | 1  | 1  | 2 |
| 1nw4CD | IMH,I<br>PA | 1  | 1  | 1 | 1 | 1  | N  | 1  | 1  | 1 |
| 1nzcAB | TDX         | 1  | 1  | 1 | 1 | 1  | 3  | 1  | 1  | 1 |
| 1oe8AB | GSH         | N  | N  | N | N | 15 | N  | 2  | N  | 2 |
| 1ohvAB | PLP,F<br>ES | 38 | 51 | 2 | 1 | 1  | 1  | 3  | 36 | 8 |
| 1osyAB | ACE         | 24 | 24 | N | N | N  | N  | N  | 23 | N |
| 1p4aCD | PCP         | 10 | 19 | 3 | 2 | 2  | N  | 4  | 21 | 2 |
| 1q0kBE | THJ         | 1  | 1  | 1 | 1 | N  | N  | 1  | 1  | 2 |
| 1q4tAB | 4CO         | 1  | 1  | 1 | 1 | 2  | N  | 2  | 1  | 1 |
| 1q5hBC | DUD         | 2  | 3  | 5 | 4 | 5  | 4  | 4  | 5  | 2 |
| 1qapAB | NTM         | 2  | 2  | 1 | 1 | 3  | N  | 1  | 2  | 1 |
| 1qk3AB | 5GP         | 1  | 3  | 7 | 3 | 4  | N  | 10 | 2  | 7 |
| 1qqjAB | CAC         | N  | N  | 3 | 3 | 1  | N  | N  | N  | 1 |
| 1qu4AB | PLP         | 2  | 3  | 1 | 1 | 5  | N  | 1  | 2  | 3 |
| 1r8sAE | GDP,S<br>O3 | 1  | 2  | 3 | 1 | 1  | N  | 2  | 1  | N |
| 1re5CD | CIT         | 55 | 56 | N | N | 42 | N  | N  | 95 | N |
| 1rl8AB | RIT         | 1  | 1  | 1 | 1 | 1  | 1  | 3  | 1  | 1 |
| 1rozAB | NAD         | 12 | 8  | N | N | 13 | 4  | N  | 15 | N |
| 1s0yAD | MLA         | 1  | 3  | 2 | N | N  | 1  | 2  | 2  | N |

|        |                 |    |    |    |   |    |    |   |    |    |
|--------|-----------------|----|----|----|---|----|----|---|----|----|
| 1s63AB | SUC,F<br>PP,778 | 1  | 1  | 1  | 1 | 1  | N  | 1 | 1  | 8  |
| 1sc3AB | MLI             | 1  | 6  | 1  | 1 | 13 | N  | 1 | 3  | 3  |
| 1so3AB | TX4             | 1  | 1  | 1  | 1 | 3  | N  | 1 | 1  | 1  |
| 1sqsAB | TLA             | N  | N  | N  | N | 12 | N  | 3 | N  | 3  |
| 1ss4AB | CIT,G<br>SH     | 14 | 1  | 1  | 1 | N  | 27 | 1 | 14 | 8  |
| 1stfEI | CCS             | 4  | 3  | 7  | 2 | 14 | N  | 7 | 2  | N  |
| 1sz2AB | BGC             | 1  | 1  | 1  | 1 | 21 | N  | 1 | 1  | 2  |
| 1sz3AB | GNP             | 2  | 3  | 4  | 3 | 2  | N  | 1 | 3  | 3  |
| 1t0iAB | FMN             | 1  | 1  | 1  | 1 | 1  | 1  | 1 | 1  | 1  |
| 1t0lCD | NAP,I<br>CT     | 1  | 1  | 1  | 1 | 1  | N  | 1 | 1  | 2  |
| 1t5bAB | FMN             | 1  | 1  | 1  | 1 | 1  | 1  | 1 | 1  | 1  |
| 1tu6AB | FSP             | 1  | 1  | 1  | 1 | 1  | N  | 1 | 1  | 1  |
| 1ty9AB | FMN             | 1  | 1  | 1  | 1 | 1  | N  | 1 | 1  | 1  |
| 1u08AB | PLP             | N  | N  | 6  | N | 1  | N  | 2 | N  | N  |
| 1v3vAB | NAP,5<br>OP     | 1  | 1  | 1  | 1 | 1  | 1  | 1 | 1  | 1  |
| 1vfsAB | KCX,<br>DCS     | 2  | 2  | 2  | 2 | 1  | 1  | 1 | 2  | 3  |
| 1vgqAB | CAO             | 1  | 1  | 1  | 1 | 1  | 2  | 1 | 1  | 2  |
| 1vhzAB | APR             | N  | N  | N  | N | 4  | N  | 2 | N  | 4  |
| 1vi0AB | DCC             | 1  | 1  | 1  | 1 | 1  | 1  | 1 | 1  | 1  |
| 1vp4AB | PLP,U<br>NL     | 1  | 1  | 1  | 1 | 1  | N  | 1 | 1  | 1  |
| 1w2yAB | DUN             | N  | N  | 3  | N | 3  | N  | 1 | N  | 1  |
| 1w98AB | TPO             | N  | N  | 10 | 3 | 21 | N  | 5 | N  | 10 |
| 1wgtAB | PCA             | 28 | 23 | N  | N | N  | N  | N | 30 | N  |
| 1wkqAB | IMD             | 2  | 6  | 8  | 2 | 5  | 10 | 1 | 1  | N  |
| 1wliAB | FMN             | 1  | 1  | 1  | 1 | 1  | 1  | 2 | 1  | 1  |
| 1wofAB | I12             | 3  | 3  | 5  | 2 | 3  | N  | 6 | 3  | 1  |

|        |             |    |    |   |   |    |    |   |    |    |
|--------|-------------|----|----|---|---|----|----|---|----|----|
| 1wyuGH | PLP         | N  | N  | N | N | 5  | N  | 1 | N  | N  |
| 1x9hAB | F6R         | 3  | 3  | 7 | 2 | 6  | N  | 7 | 3  | 3  |
| 1xa4AB | BTB,C<br>OA | 1  | 1  | 1 | 1 | 4  | N  | 1 | 1  | 3  |
| 1xd3AB | GVE         | 1  | 1  | N | N | N  | N  | 2 | 1  | 4  |
| 1xetAB | 3IO         | 1  | 1  | 1 | 1 | N  | 3  | 4 | 2  | 3  |
| 1xrkAB | BLM         | 1  | 1  | 2 | 1 | 1  | N  | 1 | 1  | 1  |
| 1y0gCD | 8PP         | 1  | 1  | 2 | 1 | 2  | 2  | 1 | 1  | 2  |
| 1y7pAC | RIP         | 3  | 3  | 3 | 3 | 17 | 1  | 1 | 3  | 10 |
| 1yaaCD | MAE,<br>PLP | 1  | 3  | 8 | 3 | 2  | N  | 1 | 1  | 7  |
| 1yb5AB | NAP         | 1  | 1  | 1 | 1 | 1  | N  | 5 | 1  | 1  |
| 1yiyAB | PMP         | N  | N  | N | N | 10 | N  | 1 | N  | 1  |
| 1yliAB | COA         | 1  | 1  | 1 | 1 | 1  | 1  | 6 | 1  | 1  |
| 1ypqAB | DIO         | 1  | 1  | 1 | 1 | 1  | 2  | 1 | 1  | 1  |
| 1yqdAB | NAP,D<br>TT | 1  | 1  | 2 | 1 | 4  | N  | 1 | 1  | 1  |
| 1ytaAB | FLC         | 1  | 1  | 3 | 1 | 5  | 4  | 6 | 1  | 4  |
| 1yukAB | NDG         | N  | N  | N | N | N  | 43 | N | N  | N  |
| 1yzxAB | GSF         | 1  | 1  | 1 | 1 | 1  | 1  | 1 | 1  | 2  |
| 1z2iAB | NAD         | 1  | 1  | 1 | 1 | 1  | 1  | 1 | 1  | 1  |
| 1zhhAB | NHE         | 1  | 40 | 3 | 2 | 9  | N  | 3 | 1  | 8  |
| 1zosCD | MTM         | 1  | 1  | 1 | 2 | 2  | 4  | 1 | 1  | 1  |
| 2a87AB | FAD,<br>NAP | 32 | 41 | 4 | 1 | 1  | N  | 2 | 23 | 2  |
| 2af6BC | FAD,B<br>RU | 4  | 5  | 4 | 1 | 3  | 1  | 1 | 8  | 1  |
| 2ag1CD | TPP         | 1  | 1  | 1 | 1 | 1  | N  | N | 1  | 1  |
| 2arvAB | 1PG         | 5  | 5  | 7 | N | 4  | 11 | 1 | 4  | 7  |
| 2b5aAB | ACY         | N  | N  | N | N | N  | 11 | 4 | N  | N  |
| 2b67CD | FMN         | 1  | 1  | 1 | 1 | 1  | N  | 2 | 1  | 1  |
| 2betCD | DEZ         | 1  | 1  | 1 | 1 | 1  | N  | 1 | 1  | 2  |



|        |             |    |    |   |   |    |    |   |    |   |
|--------|-------------|----|----|---|---|----|----|---|----|---|
| 2bnnAB | FCN         | 1  | 1  | 2 | 1 | 11 | N  | 1 | 1  | 8 |
| 2c0rAB | PLP         | 17 | 37 | N | N | 2  | N  | 2 | 37 | 9 |
| 2cg5AB | COA         | 1  | 1  | 1 | 1 | 1  | 1  | 1 | 1  | 2 |
| 2ch1AD | PLP         | 3  | 5  | N | N | 4  | N  | 1 | 5  | N |
| 2czeAB | U5P,C<br>IT | 1  | 1  | 1 | 1 | 1  | 2  | 1 | 1  | 1 |
| 2f62AB | 12M         | 1  | 1  | 1 | 1 | 1  | N  | 3 | 1  | 1 |
| 2f7sAB | GDP         | 2  | 4  | 5 | N | 19 | 3  | 3 | 8  | N |
| 2f98CD | NGV         | N  | N  | 2 | N | 1  | N  | 1 | N  | 2 |
| 2fm1AD | LLP         | 1  | 1  | 1 | 1 | 1  | 1  | 1 | 1  | 1 |
| 2fnuAB | PMP,U<br>D1 | 1  | 1  | 1 | 1 | 1  | 2  | 1 | 1  | 1 |
| 2freAB | FMN         | 1  | 1  | 1 | 1 | 1  | N  | 1 | 1  | 1 |
| 2fxaAB | 1PE,P<br>6G | 2  | 2  | 2 | 2 | 2  | N  | 1 | 2  | 2 |
| 2g9zAB | VNP         | 1  | 1  | 1 | 1 | 4  | N  | 1 | 1  | 1 |
| 2gb3EF | LLP         | 29 | 59 | N | N | 3  | N  | 1 | 25 | 7 |
| 2gf6AB | COA         | 1  | 1  | 1 | 1 | 2  | N  | 1 | 1  | 1 |
| 3proAC | AES         | 3  | 2  | 2 | 2 | 1  | N  | 2 | 3  | 4 |
| 4ecaAC | AEI         | 2  | 2  | 3 | 2 | 11 | 41 | 5 | 1  | N |
| 6cscAB | COF,C<br>IT | 1  | 1  | 1 | 1 | 1  | 1  | 1 | 1  | 1 |
| 6pfkAB | PGA         | 1  | 6  | 8 | 3 | 5  | 6  | 2 | 5  | 7 |

**Table S7. Detailed prediction results of ligand-binding sites on protein-protein interfaces using the MF-PLB, PLB, Ligsite-csc, MPK2, ConCavity, Surfnet, Q-SiteFinder, LISE and SiteHound.** The numbers in the table reflect the ranking of the actual ligand-binding site, and “N” indicates that the ligand-binding site was not found using the method.
